# Supplementary material for: Breast cancer extracellular matrix invasion depends on local mechanical loading of the collagen network
Source: Royal Society of Chemistry journal article supplement (doi:10.1039/d4tb01474j), 2025-01-01
Supplement: d4tb01474j8.xlsx [file d4tb01474j8.xlsx]

## Sheet: bead swelling
		area (mm2)
			day 0	day 1	day 3	day 7
	magnet	A5	0.600558	0.792478	0.819169	0.737884
		A6	0.605076	0.739177	0.735005	0.858956
		B5	0.696828	0.718026	0.758278	0.725597
		B6	0.673568	0.758965	0.884302	0.783242
	no magnet	D1	0.660946	0.797455	0.780789	0.747468
		D2	0.488471	0.815043	0.806594	0.766071
		C1	0.563354	0.806862	0.825515	0.743596
		C2	0.608336	0.756435	0.786292	0.790041
			0	1	3	7
		Average for Magnet	0.644007	0.752161	0.799188	0.77642
		Average for no Magnet	0.580277	0.793949	0.799797	0.761794
		SD for magnet	0.0485363	0.0316519	0.0669244	0.0603509
		SD for no magnet	0.0730511	0.0260209	0.0204233	0.0212333

## Sheet: bead displacement
	Displacement (microns)
Time (h)	Far1	Far2	Far 3	Far 4	Near1	Near2	Near3	Near 4	Time	Average Far	Average Near		sd Far	sd Near	sem Far	sem Near
0	0	0	0	0	0	0	0	0	0	0	0		0	0	0	0
0.0166667	12.7033	15.4292	56.3521	5.41379	81.6724	39.02	49.6933		0.0166667	22.4746	56.7952		22.9773	22.1954	16.2474	11.0977
0.5	32.6788	36.2976	64.5862	21.7967	114.34	59.8857	74.3348		0.5	38.8398	82.8536		18.237	28.2091	12.8955	14.1046
8	98.8929	105.248			178.755	118.875			8	102.07	148.815		4.49353	42.3417	3.1774	21.1709
24	100.737	111.618	67.3176	35.4083	194.195	119.78	136.85	426.811	24	78.7702	219.409		34.5105	141.884	24.4026	70.942
48	102.55	103.441	72.7269	46.2949	206.896	124.318	147.889	549.355	48	81.2532	257.114		27.329	197.899	19.3245	98.9494
72	106.152	106.17	83.6425	49.0263	217.785	120.682	142.445	563.674	72	86.2475	261.147		26.9893	205.932	19.0843	102.966
168	196.018	113.434	94.392	58.8784	364.794	203.264	236.833	573.924	168	115.681	344.704		58.1345	167.915	41.1073	83.9577

## Sheet: XTT and Alamar Blue data
Alamar Blue data													XTT data
# of Trail	C	M		# of Trail	C	M		# of Trail	C	M			Trial 1 and 4: relaxation					Trial 2 and 3: steady compression					Trials 5 and 6: first time compression during XTT
T1_First Time Compresing	0.942626	1.58615		T1_Steady Compress	0.744087	0.229826		T1_Relaxation	0.995424	1.182
	1.17454	0.396008			0.757193	0.324065			1.01514	1.08593			# of Trail	C	N	F			C	N	F		# of Trail	C	N	F
	0.97085	1.27379			0.979998	0.20923			1.06924	1.07784			1	1.28205	1.25626	0.956258							5	1.08956	0.849383	0.964115
	1.25216	0.675902			0.812738	0.0756725			1.39637	1.2189				1.14053	1.11604	1.06139								0.972204	0.799727	0.957734
	0.866419	1.50571			1.08485	1.15599			0.617226	1.19666				1.00765	1.50806	1.08224								0.884207	0.917065	0.884742
	1.22675	0.801973			0.945048	0.165543			1.19615					0.91256	1.13435	1.04144								0.930676	0.868294	0.834642
	0.917223	0.76434			1.20717	1.10669		T2_Relaxation	1.00704	1.26901				0.901025	1.76347	1.20478								1.08224	1.01024	0.900861
	0.553125	0.658968			1.10107	1.28019			0.937265	1.19566				0.999771	1.14297	1.07219								0.960193	0.92504	0.88468
	0.928984	1.24369			1.1329	1.54107			0.867997	1.45351				1.00352	1.36423	1.07616								1.08892	0.873004	0.929318
	0.658968	0.82173			1.05364	1.3788			0.824515	1.36126				0.752885	1.20455	1.11528								0.991994	0.959539	0.901946
	1.50853	1.19524			1.14851	1.34447			1.10968	1.01894								2	1.07129	0.95638	1.0311		6	1.35628	0.993719	1.04447
		1.16654			1.03305	1.42998			0.964062	1.28235									1.01099	0.910164	1.05342			1.03188	0.719939	0.763037
	Control	Magnet			Control	Magnet			0.902797	1.37515									0.924122	0.875436	0.854997			0.804608	0.925811	0.89879
mean	1.00002	1.0075		mean	1.00002	0.853461			0.964481	1.12953									1.00652	1.11483	0.893842			1.11934	0.931039	0.858284
sd	0.274581	0.370689		sd	0.155784	0.589483			1.19065	1.30291									0.96591	1.08047	0.931422			0.873463	0.939816	1.30618
sem	0.137291	0.185345		sem	0.077892	0.294742			0.942252	1.71524									0.99986	0.980489	0.976267			1.09164	1.43421	0.847044
									0.973372	1.29568									0.992575	0.942461	0.943171			0.925327	1.0026	1.15178
p-value	0.956964			p-value	0.413976				1.06284	1.70246									1.02873	0.975626	1.00621			0.797464	1.04776	1.05971
n	11	12		n	12	12			0.896684									3	0.882318	0.775671	0.903727			Control	Near Magnet	Far Magnet
trials	1	1		trials	1	1			0.851672										0.990466	1.07409	0.866738		mean	1	0.949824	0.949208
									1.07118										1.07692	0.946226	0.988508		sd	0.140168	0.153494	0.13475
									1.0834										0.98929	1.10519	1.03509		sem	0.0991134	0.108536	0.0952826
									1.06062										0.900106	0.956501	1.00868			CvN	NvF	FvC
																			0.990397	0.978871	1.02728		p-value	0.341985	0.990459	0.304408
								T3_Relaxation	0.878819	0.981214									1.02668	0.977366	1.21336		n	16	16	16
									1.03996	1.17213									1.14383	1.05042	1.31318		trials	2	2	2
									1.04893	1.32063			4	0.904819	1.50078	1.31335
									1.03221	1.25291				0.988876	1.75238	1.56243
									Control	Magnet				1.15218	1.37569	1.37142
								mean	1	1.26619				1.12791	1.10382	1.65806
								sd	0.143555	0.188492				0.893877	1.72197	1.41294
								sem	0.0828818	0.108826				1.0799	1.29057	1.53908
														0.859018	1.49601	1.31175
								p-value	1.32458e-06					0.993411	1.34473	1.03329
								n	27	21				C	N	F			Control	Near Magnet	Far Magnet
								trials	1,2 and 3	1,2 and 3			mean	1	1.37974	1.23825		mean	1	0.981262	1.00294
													sd	0.132703	0.225858	0.218647		sd	0.0655679	0.0890618	0.120369
													sem	0.0938352	0.159706	0.154607		sem	0.0463635	0.0629762	0.0851134
														CvN	NvF	FvC			CvN	NvF	FvC
													p-value	2.45166e-06	0.0818637	0.000805751		p-value	0.503133	0.566887	0.932267
													n	16	16	16		n	16	16	16
													trials	2	2	2		trials	2	2	2

## Sheet: cell adhesion to beads
	Scale Factor= 1946.7935 Pixels/mm
Area (sq.Pixels)	Bead 1							Bead 2							Bead 3							Bead 4							Bead 5
	Field of View							Field of View							Field of View							Field of View							Field of View
	1	2	3	4	5	6	7	1	2	3	4	5	6	7	1	2	3	4	5	6	7	1	2	3	4	5	6	7	1	2	3	4	5	6	7
Condition 1	136484	134276	268000	328397	52622	310900	610676	850996	120350	361000	71655	210788	113220	91541	344840	208780	178545	94672	224083	215262	17628	308789	384759	380044	470951	389300	303252	411662	460320	168796	327352	443212	511436	339215	619548
Condition 2	255898	127008	890915	330278	552625	680672	885812	750824	656180	130016	302988	934821	838551	554113	500796	448102	258332	720003	312108	100676	741216	928160	844966	872262	902985	723056	364256	504094	566294	719978	624708	645616	417388	819351	814066
Condition 3	293126	580512	92472	210476	935260	235540	739144	910350	59040	73230	105316	110146	160706	439889	351853	249308	585002	495726	835322	552914	552914	181260	601758	638192	387001	745468	596198	726871	404348	636694	887964	424115	1043717	428875	615856
Condition 4	744580	962302	1006300	939636	772677	750266	1092320	920237	1104510	606448	837643	798542	531664	1065384	516521	441549	425064	626277	638628	431284	966616	849258	795344	613755	492468	695425	521025	721526	652825	593136	663322	526786	494526	642392	682623
Condition 5	533315	438258	802424	625106	702266	517939	622576	668552	296562	652824	458756	162663	303516	324520	329529	201940	481264	347252	651484	195482	556668	543107	761514	593612	723524	739483	341505	470522	727352	550659	811968	712522	432604	418275	554568
Area (sq. mm)	Bead 1							Bead 2							Bead 3							Bead 4							Bead 5
	Field of View							Field of View							Field of View							Field of View							Field of View
	1	2	3	4	5	6	7	1	2	3	4	5	6	7	1	2	3	4	5	6	7	1	2	3	4	5	6	7	1	2	3	4	5	6	7
Condition 1	0.0360116	0.035429	0.0707123	0.0866482	0.0138844	0.0820316	0.161128	0.224537	0.0317546	0.0952505	0.0189063	0.0556168	0.0298733	0.0241533	0.0909867	0.055087	0.0471094	0.0249794	0.0591247	0.0567973	0.00465118	0.0814746	0.101519	0.100275	0.124261	0.102718	0.0800136	0.108618	0.121456	0.0445371	0.0863724	0.116942	0.134943	0.0895025	0.163469
Condition 2	0.0675192	0.0335113	0.23507	0.0871445	0.145811	0.179597	0.233723	0.198106	0.173134	0.034305	0.079944	0.246654	0.221253	0.146204	0.132136	0.118233	0.0681614	0.189974	0.0823503	0.0265636	0.195571	0.244897	0.222946	0.230148	0.238254	0.19078	0.0961096	0.133006	0.149418	0.189968	0.16483	0.170347	0.110129	0.216187	0.214793
Condition 3	0.0773419	0.153169	0.0243989	0.0555345	0.24677	0.0621477	0.195025	0.240198	0.0155778	0.0193219	0.0277878	0.0290622	0.0424026	0.116066	0.0928371	0.0657804	0.154354	0.130798	0.220401	0.145887	0.145887	0.0478258	0.158775	0.168388	0.102111	0.196693	0.157308	0.191786	0.106688	0.167993	0.234291	0.111904	0.275387	0.113159	0.162495
Condition 4	0.196459	0.253905	0.265514	0.247925	0.203872	0.197959	0.288211	0.242806	0.291427	0.160012	0.221014	0.210697	0.140281	0.281104	0.136285	0.116504	0.112154	0.165244	0.168503	0.113795	0.255043	0.224078	0.209853	0.16194	0.129939	0.183489	0.137473	0.190376	0.172249	0.1565	0.175019	0.138993	0.130482	0.169496	0.180111
Condition 5	0.140716	0.115635	0.211721	0.164935	0.185294	0.136659	0.164268	0.176399	0.0782484	0.172249	0.121044	0.0429189	0.0800833	0.0856252	0.0869469	0.0532823	0.126982	0.0916231	0.171895	0.0515783	0.146878	0.1433	0.200927	0.156626	0.190903	0.195114	0.0901067	0.124148	0.191913	0.145292	0.214239	0.188	0.114143	0.110363	0.146324
Number of Cells	Bead 1								Bead 2								Bead 3								Bead 4								Bead 5
	Field of View								Field of View								Field of View								Field of View								Field of View
	1	2	3	4	5	6	7	Total cells	1	2	3	4	5	6	7	Total Cells	1	2	3	4	5	6	7	Total Cells	1	2	3	4	5	6	7	Total Cells	1	2	3	4	5	6	7
Condition 1	4	15	8	8	4	12	10	61	16	5	7	3	10	2	4	47	9	18	6	4	11	25	2	75	6	41	26	9	3	12	5	102	5	27	16	8	7	19	15
Condition 2	18	4	19	11	7	12	31	102	20	9	7	19	27	18	6	106	23	28	11	26	13	5	34	140	31	11	30	56	23	14	44	209	37	16	20	31	9	25	46
Condition 3	6	4	2	4	23	8	23	70	21	8	2	4	6	7	29	77	10	2	6	9	26	12	28	93	7	6	4	10	33	21	31	112	11	5	7	10	35	14	42
Condition 4	132	86	161	153	120	98	136	886	180	210	100	157	132	99	189	1067	164	63	138	143	133	109	152	902	144	166	132	96	129	154	117	938	89	154	149	122	99	163	127
Condition 5	63	50	103	45	67	46	56	430	88	40	96	37	21	54	26	362	53	21	64	27	145	23	84	417	67	111	65	87	91	44	57	522	96	85	146	61	43	50	29
Number of cells per area sq.pixels
	Bead 1							Bead 2							Bead 3							Bead 4							Bead 5
	Field of View							Field of View							Field of View							Field of View							Field of View
	1	2	3	4	5	6	7	1	2	3	4	5	6	7	1	2	3	4	5	6	7	1	2	3	4	5	6	7	1	2	3	4	5	6	7	Average	SD	CV
Condition 1	2.93075e-05	0.00011171	2.98507e-05	2.43608e-05	7.60138e-05	3.85976e-05	1.63753e-05	0.000132946	1.38504e-05	9.76903e-05	1.42323e-05	8.83236e-05	2.18481e-05	1.15996e-05	2.60991e-05	8.62152e-05	3.3605e-05	4.22511e-05	4.9089e-05	0.000116138	0.000113456	1.94307e-05	0.00010656	6.84131e-05	1.91103e-05	7.70614e-06	3.9571e-05	1.21459e-05	1.0862e-05	0.000159956	4.8877e-05	1.80501e-05	1.3687e-05	5.60117e-05	2.42112e-05	5.08043e-05	4.15598e-05	0.818036
Condition 2	7.03405e-05	3.14941e-05	2.13264e-05	3.33053e-05	1.26668e-05	1.76296e-05	3.49961e-05	3.04794e-05	6.92222e-05	2.31032e-05	2.03247e-05	3.21984e-05	3.24843e-05	1.19809e-05	4.59269e-05	6.24858e-05	4.25809e-05	3.6111e-05	4.16522e-05	4.96643e-05	4.58706e-05	3.33994e-05	1.30183e-05	3.43933e-05	6.20165e-05	3.18094e-05	3.84345e-05	8.72853e-05	6.53371e-05	2.22229e-05	3.2015e-05	4.80162e-05	2.15627e-05	3.0512e-05	5.65065e-05	3.83535e-05	1.8116e-05	0.472343
Condition 3	2.0469e-05	6.89047e-06	2.16282e-05	1.90045e-05	2.45921e-05	3.39645e-05	3.11171e-05	0.000355691	0.000109245	1.89905e-05	3.63154e-05	3.73353e-05	1.59131e-05	8.24208e-05	2.8421e-05	8.02221e-06	1.02564e-05	1.81552e-05	3.11257e-05	2.17032e-05	5.06408e-05	3.86186e-05	9.97079e-06	6.26771e-06	2.58397e-05	4.42675e-05	3.52232e-05	4.26486e-05	2.72043e-05	7.85307e-06	7.8832e-06	2.35785e-05	3.3534e-05	3.26435e-05	6.81978e-05	3.95895e-05	5.90675e-05	1.492
Condition 4	0.000177281	8.9369e-05	0.000159992	0.000162829	0.000155304	0.00013062	0.000124506	0.000162968	0.000346279	0.000119383	0.000196608	0.000248277	9.29242e-05	0.00036591	0.000317509	0.00014268	0.000324657	0.000228333	0.000208259	0.000252734	0.00015725	0.00016956	0.000208715	0.00021507	0.000194937	0.000185498	0.000295571	0.000162156	0.000136331	0.000259637	0.000224627	0.000231593	0.000200192	0.000253739	0.000186047	0.000202496	6.88292e-05	0.339905
Condition 5	0.000118129	0.000114088	0.000128361	7.19878e-05	9.54054e-05	8.88135e-05	8.99489e-05	0.000296734	6.12723e-05	0.000209262	0.000227464	6.91891e-05	0.0001664	7.89005e-05	0.000160836	0.000103991	0.000132983	7.77533e-05	0.000222569	0.000117658	0.000150898	0.000123364	0.000145762	0.000109499	0.000120245	0.000123059	0.000128841	0.000121142	0.000131986	0.000154361	0.00017981	8.56114e-05	9.93981e-05	0.000119539	5.2293e-05	0.00012793	5.16327e-05	0.403601
	Bead 1							Bead 2							Bead 3							Bead 4							Bead 5
	Average	SD	CV					Average	SD	CV					Average	SD	CV					Average	SD	CV					Average	SD	CV
Condition 1	4.66023e-05	3.45356e-05	0.741071					5.43557e-05	5.05692e-05	0.930339					6.66932e-05	3.7997e-05	0.569728					3.89911e-05	3.63062e-05	0.931142					4.73793e-05	5.26245e-05	1.11071
Condition 2	3.16798e-05	1.90369e-05	0.600915					3.1399e-05	1.82655e-05	0.581723					4.63274e-05	8.29524e-06	0.179057					4.29081e-05	2.42693e-05	0.56561					3.94532e-05	1.72547e-05	0.437346
Condition 3	2.25237e-05	8.85835e-06	0.39329					9.37016e-05	0.000120492	1.28592					2.40463e-05	1.45124e-05	0.603516					2.89766e-05	1.54891e-05	0.534539					2.86992e-05	2.03936e-05	0.710598
Condition 4	0.000142843	2.99442e-05	0.20963					0.000218907	0.000106536	0.486671					0.00023306	7.1253e-05	0.305728					0.000204501	4.45155e-05	0.217679					0.000213166	4.29808e-05	0.20163
Condition 5	0.000100962	1.98199e-05	0.19631					0.00015846	9.15328e-05	0.577639					0.000138098	4.66634e-05	0.3379					0.000124559	1.10203e-05	0.0884746					0.000117571	4.2918e-05	0.365039
Number of cells per area sq.mm
	Bead 1							Bead 2							Bead 3							Bead 4							Bead 5
	Field of View							Field of View							Field of View							Field of View							Field of View
	1	2	3	4	5	6	7	1	2	3	4	5	6	7	1	2	3	4	5	6	7	1	2	3	4	5	6	7	1	2	3	4	5	6	7	Average	SD	CV
Condition 1	111.075	423.382	113.134	92.3274	288.093	146.285	62.0625	71.2578	157.458	73.4904	158.677	179.802	66.9494	165.609	98.9156	326.756	127.363	160.132	186.047	440.162	429.998	73.6426	403.864	259.286	72.428	29.2063	149.974	46.033	41.1671	606.236	185.244	68.4098	51.8736	212.285	91.7606	176.297	139.385	0.790627
Condition 2	266.591	119.363	80.8271	126.227	48.0073	66.8164	132.636	100.956	51.9828	204.052	237.666	109.465	81.3547	41.0386	174.063	236.821	161.382	136.861	157.862	188.228	173.85	126.584	49.3393	130.351	235.043	120.558	145.667	330.812	247.628	84.2249	121.337	181.981	81.7226	115.64	214.16	145.174	69.7871	0.480713
Condition 3	77.5777	26.1149	81.9709	72.0273	93.2042	128.726	117.934	87.428	513.551	103.51	143.948	206.454	165.084	249.859	107.716	30.4042	38.8717	68.8083	117.967	82.2552	191.929	146.365	37.7893	23.7546	97.9327	167.774	133.496	161.638	103.104	29.7632	29.8774	89.3627	127.094	123.719	258.47	121.014	90.8125	0.750432
Condition 4	671.896	338.709	606.371	617.123	588.604	495.052	471.877	741.332	720.592	624.951	710.363	626.493	705.729	672.35	1203.36	540.756	1230.45	865.385	789.302	957.862	595.977	642.632	791.03	815.115	738.81	703.039	1120.22	614.573	516.694	984.025	851.337	877.739	758.728	961.673	705.119	738.722	198.427	0.268608
Condition 5	447.71	432.394	486.489	272.834	361.587	336.604	340.907	498.87	511.192	557.333	305.675	489.294	674.298	303.649	609.568	394.127	504.007	294.686	843.537	445.924	571.904	467.551	552.44	415.002	455.728	466.394	488.31	459.129	500.226	585.027	681.481	324.468	376.719	453.052	198.191	460.18	129.691	0.281827
	Bead 1							Bead 2							Bead 3							Bead 4							Bead 5
	Average	SD	CV					Average	SD	CV					Average	SD	CV					Average	SD	CV					Average	SD	CV
1	176.623	130.89	0.741071					124.749	51.2362	0.410714					252.768	144.009	0.569728					147.776	137.601	0.931142					179.568	199.447	1.11071
2	120.067	72.1499	0.600915					118.074	74.9584	0.634844					175.581	31.439	0.179057					162.622	91.9806	0.56561					149.528	65.3953	0.437346
3	85.3649	33.5732	0.39329					209.976	145.195	0.691481					91.1358	55.0019	0.603516					109.821	58.7038	0.534539					108.77	77.2918	0.710598
4	541.376	113.489	0.20963					685.973	45.9989	0.0670564					883.299	270.049	0.305728					775.059	168.714	0.217679					807.902	162.897	0.20163
5	382.646	75.1174	0.19631					477.187	133.28	0.279303					523.393	176.855	0.3379					472.079	41.767	0.0884746					445.595	162.659	0.365039
